# Supplementary material for: Tween 80 Micelles Loaded with Fe3O4 Nanoparticles and Artemisinin for Combined Oxygen-Independent Ferroptosis Therapy of Cancer
Source: MDPI journal article supplement (doi:10.3390/pharmaceutics16050639), 2024-05-09
Supplement: s1 [file s1]

## Supporting information

### **Tween 80 micelles loaded with Fe<sub>3</sub>O<sub>4</sub> Nanoparticles and Artemisinin for combined oxygen-independent ferroptosis therapy of cancer**

**Junming Cui <sup>1,2</sup>, Xinxi Cai <sup>1,2</sup>, Rui Qian <sup>1,2</sup>, Lin Wu <sup>2,\*</sup>, Xueyong Qi <sup>1</sup>, Jin Cao<sup>1</sup> and Song Shen<sup>1,\*</sup>**

<sup>1</sup> *College of Pharmaceutical Sciences, Jiangsu University, Zhenjiang, Jiangsu 212013, China*

<sup>2</sup> *Affiliated Hospital of Jiangsu University, Zhenjiang 212001, China*

\* Corresponding authors:

E-mail address: jsdx.shensong@163.com (S. Shen); linmeimei1983@163.com (L. Wu)

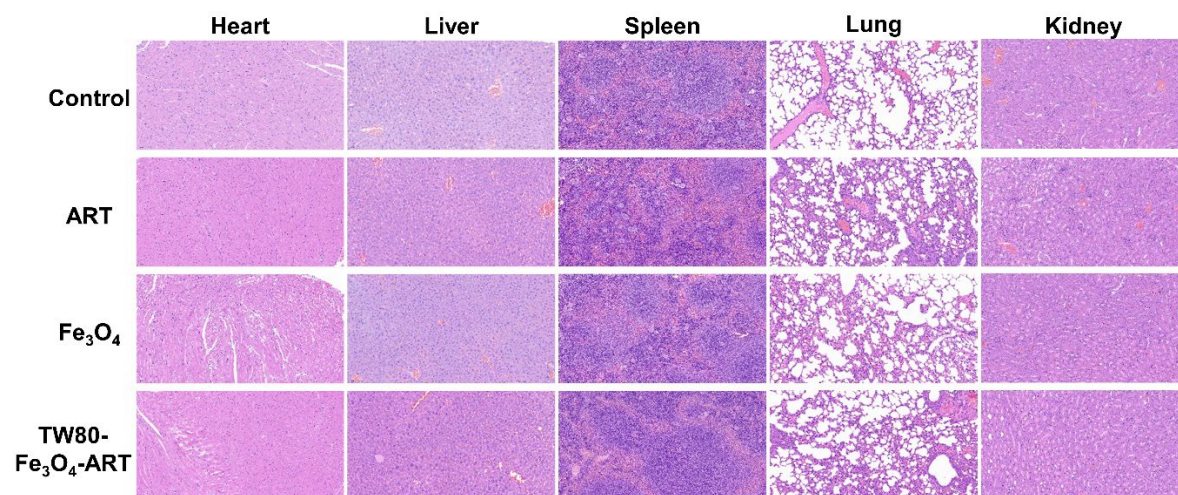

**Figure S1.** H&E stained images of major organs of mice after different treatments.
